# Supplementary material for: Comparison of total water vapour content in the Arctic derived from GNSS, AIRS, MODIS and SCIAMACHY
Source: Copernicus journal article supplement (doi:10.5194/amt-11-2949-2018), 2018-05-18
Supplement: Supplementary file 1 [file amt-11-2949-2018-supplement.zip]

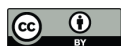

## *Supplement of*

# **Comparison of total water vapour content in the Arctic derived from GNSS, AIRS, MODIS and SCIAMACHY**

**Dunya Alraddawi et al.**

*Correspondence to:* Alain Sarkissian ([alain.sarkissian@latmos.ipsl.fr](mailto:alain.sarkissian@latmos.ipsl.fr))

- [amt-11-2949-2018-supplement-title-page.pdf](#)
- [Ny-Alesund.txt](#)
- [Sodankyla.txt](#)
- [Thule.txt](#)

The copyright of individual parts of the supplement might differ from the CC BY 4.0 License.
